# Supplementary material for: Response of Lactiplantibacillus plantarum NMGL2 to Combinational Cold and Acid Stresses during Storage of Fermented Milk as Analyzed by Data-Independent Acquisition Proteomics
Source: MDPI journal article supplement (doi:10.3390/foods10071514), 2021-06-30
Supplement: s1 [file s1]

**Table S1.** Growth of 31 strains of lactic acid bacteria isolated from traditional fermented products in MRS broth at 37°C for 18 h as shown with viable bacterial counts ( $n = 3$ ,  $\bar{x} \pm SD$ ).

| Strain                      | Viable bacterial count(log cfu/ml) | Strain                   | Viable bacterial count(log cfu/ml) | Strain                      | Viable bacterial count(log cfu/ml) |
|-----------------------------|------------------------------------|--------------------------|------------------------------------|-----------------------------|------------------------------------|
| <i>Lpb. pentosus</i> PC11   | 10.35±0.27                         | <i>Lpb. plantarum</i> P6 | 9.65±0.15                          | <i>Lpb. pentosus</i> PC1    | 6.93±0.10                          |
| <i>Lpb. plantarum</i> NMGL2 | 10.19±0.15                         | <i>Lcb. casei</i> JS2    | 9.61±0.09                          | <i>Lpb. plantarum</i> NMGL4 | 6.86±0.23                          |
| <i>Lpb. plantarum</i> P4    | 10.18±0.04                         | <i>Lcb. casei</i> JS1    | 9.57±0.20                          | <i>Lab. brevis</i> JS5      | 6.37±0.39                          |
| <i>Lpb. plantarum</i> NMGL1 | 10.14±0.15                         | <i>Lab. brevis</i> PC9   | 8.94±0.53                          | <i>Lpb. pentosus</i> PC13   | 6.21±0.27                          |
| <i>Lpb. plantarum</i> P3    | 10.10±0.03                         | <i>Lab. brevis</i> PC3   | 8.76±0.17                          | <i>Lpb. pentosus</i> PC4    | 6.15±0.51                          |
| <i>Lpb. plantarum</i> NMGL3 | 10.07±0.07                         | <i>Lab. brevis</i> PC2   | 8.70±0.15                          | <i>Lpb. plantarum</i> NMGL5 | 5.98±0.05                          |
| <i>Lpb. plantarum</i> PC10  | 10.06±0.06                         | <i>Lab. brevis</i> PC6   | 8.68±0.13                          | <i>Lab. brevis</i> JS3      | 5.84±0.31                          |
| <i>Lpb. plantarum</i> P2    | 9.88±0.07                          | <i>Lab. brevis</i> PC5   | 8.60±0.24                          | <i>Lab. brevis</i> JS4      | 5.19±0.52                          |
| <i>Lpb. plantarum</i> P5    | 9.82±0.07                          | <i>Lab. brevis</i> PC7   | 8.47±0.20                          | <i>Lpb. plantarum</i> PC12  | 5.18±0.43                          |
| <i>Lpb. plantarum</i> P7    | 9.79±0.20                          | <i>Lab. brevis</i> PC8   | 8.45±0.20                          |                             |                                    |
| <i>Lpb. plantarum</i> P1    | 9.71±0.30                          | <i>Lpb. pentosus</i> P7  | 7.02±0.20                          |                             |                                    |

Table S2: The gene sequence of *Lpb. plantarum* NMGL2

GGGAGGGCGCGTGCTATAATGCAGTCGAACGAACTCTGGTATTGATTGGTGCTTGCATCATGATTACATTTG  
AGTGAGTGGCGAACTGGTGAGTAACACGTGGGAAACCTGCCAGAAGCGGGGGATAACACCTGGAAACA  
GATGCTAATACCGCATAACAACCTGGACCGCATGGTCCGAGTTTGAAAGATGGCTTCGGCTATCACTTTTGA  
TGGTCCCGCGGCGTATTAGCTAGATGGTGGGGTAATGGCTCACCATGGCAATGATACGTAGCCGACCTGAGA  
GGGTAATCGGCCACATTGGGACTGAGACACGGCCCAAACCTCTACGGGAGGCAGCAGTAGGGAATCTTCC  
ACAATGGACGAAAGTCTGATGGAGCAACGCCGCGTGAGTGAAGAAGGGTTTCGGCTCGTAAACTCTGTT  
GTTAAAGAAGAACATATCTGAGAGTAACTGTTTCAGGTATTGACGGTATTTAACCAGAAAGCCACGGCTAACT  
ACGTGCCAGCAGCCGCGGTAATACGTAGGTGGCAAGCGTTGTCCGGATTTATTGGGCGTAAAGCGAGCGCA  
GGCGGTTTTTTAAGTCTGATGTGAAAGCCTTCGGCTCAACCGAAGAAGTGCATCGGAAACTGGGAACTT  
GAGTGCAGAAGAGGACAGTGGAACCTCCATGTGTAGCGGTGAAATGCGTAGATATATGGAAGAACACCAAGTG  
GCGAAGGCGGCTGTCTGGTCTGTAACCTGACGCTGAGGCTCGAAAGTATGGGTAGCAAACAGGATTAGATAC  
CCTGGTAGTCCATACCGTAAACGATGAATGCTAAGTGTTGGAGGGTTTCGCCCTTCAGTGCTGCAGCTAAC  
GCATTAAGCATTCCGCCTGGGGAGTACGGCCGCAAGGCTGAAACTCAAAGGAATTGACGGGGGCCCGCAC  
AAGCGGTGGAGCATGTGGTTTAATTCGAAGCTACGCGAAGAACCCTTACCAGTCTTGACATACTATGCAAAT  
CTAAGAGATTAGACGTTCCCTTCGGGGACAATGGATACAGTGGTGCATGGTTGTGTCGTCAGCTCGTGTCGTGA  
GATGTTGGATAAGTCCGCAACGAGCGCAACCTTATTATCAGTGCAGCATAAGTGGCACTCTGGTGAGACTGC  
CGTGACAACCGAGAGTGGGATGACGTCAATCATCATGCCTATGACTGCTAACACGTGCTACATGATGGTACA  
CGAGTTGCGAACCTCGCGAAG

Table S3. The expression levels of low temperature and acid-resistant proteins in *Lpb. plantarum* NMGL2 in fermented milk stored at low temperature (4°C) for days 1, 7, 14, and 21.

|       | Day 1 Quantity                                  |        |   | Day 7 Quantity                                          |         |                                             | Day 14 Quantity                                                 |                 |                        | Day 21 Quantity |   |         |
|-------|-------------------------------------------------|--------|---|---------------------------------------------------------|---------|---------------------------------------------|-----------------------------------------------------------------|-----------------|------------------------|-----------------|---|---------|
|       |                                                 |        |   | 1218.94                                                 |         |                                             | 31887.7 32372.9 34887.9 132057.                                 |                 |                        | 127528. 132707. |   |         |
| dnaA  | 0                                               | 0      | 0 | 0                                                       | 2       | 1233.82                                     | 4                                                               | 5               | 3                      | 1               | 6 | 8       |
|       | 3805.29 3795.26 4291.25 4256.37 6119.11         |        |   |                                                         |         |                                             | 92424.6 92574.8 99434.8 359405.                                 |                 |                        | 346913. 367442. |   |         |
| dnaJ  | 9                                               | 4      | 5 | 4                                                       | 4       | 3727.16                                     | 1                                                               | 1               | 7                      | 6               | 9 | 2       |
|       | 34755.2 36828.5 33994.8 38748.5 42968.2 40247.7 |        |   | 755230. 768227. 828651.                                 |         |                                             |                                                                 |                 |                        |                 |   |         |
| dnaK  | 2                                               | 5      | 2 | 7                                                       | 9       | 6                                           | 3                                                               | 7               | 6312466230474593179973 |                 |   |         |
|       | 7625.47 8183.75 7353.17 7529.26 5828.14 163949. |        |   |                                                         |         |                                             | 192376. 703937. 726612. 753248.                                 |                 |                        |                 |   |         |
| dnaN  | 9623.74                                         | 7      | 8 | 1                                                       | 9       | 5                                           | 5                                                               | 162473          | 7                      | 8               | 1 | 8       |
|       |                                                 |        |   |                                                         |         |                                             | 20836.3 22556.7 23097.5 76416.5 81724.6 81986.8                 |                 |                        |                 |   |         |
| dnaX  | 0                                               | 0      | 0 | 0                                                       | 0       | 0                                           | 8                                                               | 8               | 1                      | 1               | 3 | 3       |
|       |                                                 |        |   |                                                         |         |                                             | 68010.1                                                         |                 |                        | 260744. 281193. |   |         |
| grpE  | 0                                               | 0      | 0 | 0                                                       | 0       | 0                                           | 6                                                               | 68599.8 72019.2 | 5 276313 4             |                 |   |         |
|       | 95403.9 99527.3 99294.3 95845.4 97333.3 99768.4 |        |   |                                                         |         |                                             |                                                                 |                 |                        |                 |   |         |
| groEL | 7                                               | 6      | 1 | 7                                                       | 6       | 3230864422405592507343832035081154938557151 |                                                                 |                 |                        |                 |   |         |
|       | 3972.36 4539.80 4723.00 1517.15 122.257         |        |   |                                                         |         |                                             | 70985.2 67682.2 81461.5 289681. 288781. 296821.                 |                 |                        |                 |   |         |
| rbfA  | 6                                               | 2      | 1 | 4                                                       | 6       | 0                                           | 9                                                               | 6               | 3                      | 4               | 7 | 1       |
|       |                                                 |        |   |                                                         |         |                                             | 7679.88 8889.86 154467. 147795. 165678. 343556. 346412.         |                 |                        |                 |   |         |
| hsp1  | 0                                               | 0      | 0 | 8906.93                                                 | 2       | 8                                           | 9                                                               | 5               | 6                      | 7               | 6 | 368582  |
|       | 1762.36 1339.54 2306.95 1915.67 1497.80 1270.72 |        |   | 44610.6 43775.5 45799.5 160636. 176769. 166639.         |         |                                             |                                                                 |                 |                        |                 |   |         |
| hsp2  | 9                                               | 3      | 7 | 7                                                       | 6       | 5                                           | 4                                                               | 3               | 5                      | 4               | 6 | 1       |
|       | 4972.72                                         |        |   |                                                         |         |                                             | 156180. 150562. 169457. 533801. 522632. 559783.                 |                 |                        |                 |   |         |
| hsp3  | 0                                               | 0      | 7 | 0                                                       | 0       | 0                                           | 1                                                               | 7               | 5                      | 8               | 7 | 6       |
| murA  |                                                 |        |   |                                                         |         |                                             | 486.231 35503.4 31435.0 35458.4 171943. 180826. 173624.         |                 |                        |                 |   |         |
| 1     | 0                                               | 0      | 0 | 0                                                       | 0       | 8                                           | 9                                                               | 5               | 5                      | 8               | 2 | 3       |
|       |                                                 |        |   |                                                         |         |                                             | 12577.4 14110.9 15368.5                                         |                 |                        | 54802.6 56418.3 |   |         |
| murB  | 0                                               | 0      | 0 | 0                                                       | 0       | 0                                           | 2                                                               | 1               | 6                      | 55851.3         | 8 | 1       |
|       |                                                 |        |   |                                                         |         |                                             | 860.301 2584.85 33104.5 34521.5 37088.1 102248. 111729. 113298. |                 |                        |                 |   |         |
| murC  | 0                                               | 0      | 0 | 0                                                       | 1       | 7                                           | 1                                                               | 6               | 9                      | 6               | 4 | 4       |
|       | 2000.11 2035.17 1883.12 2404.64                 |        |   | 1785.34 36012.5 38024.6 42767.0 119724. 127224. 132681. |         |                                             |                                                                 |                 |                        |                 |   |         |
| murD  | 5                                               | 3      | 6 | 6                                                       | 2664.79 | 6                                           | 1                                                               | 1               | 7                      | 6               | 4 | 1       |
|       | 1169.10                                         |        |   | 1942.33                                                 |         |                                             | 63393.4 63811.3 71858.8 232787. 216100. 233090.                 |                 |                        |                 |   |         |
| murE1 | 5                                               | 0      | 0 | 0                                                       | 7       | 1676.99                                     | 4                                                               | 6               | 1                      | 8               | 2 | 6       |
|       | 1471.11 1465.11                                 |        |   | 1414.16 43052.0 44647.6 47934.7 162139. 164235.         |         |                                             |                                                                 |                 |                        |                 |   |         |
| murF  | 3                                               | 1      | 0 | 0                                                       | 0       | 8                                           | 4                                                               | 2               | 9                      | 7               | 7 | 172024  |
|       | 2900.81                                         |        |   | 3875.99 5337.40 5686.64                                 |         |                                             | 228692. 224307. 258873. 288471. 297987. 298654.                 |                 |                        |                 |   |         |
| dacA1 | 7                                               | 3415.7 | 4 | 4                                                       | 5       | 6326.56                                     | 5                                                               | 6               | 1                      | 6               | 6 | 1       |
|       |                                                 |        |   |                                                         |         |                                             | 29276.5 27690.8                                                 |                 |                        | 35962.2 34832.1 |   |         |
| dacB  | 0                                               | 0      | 0 | 0                                                       | 0       | 0                                           | 9                                                               | 6               | 32534.3                | 5               | 2 | 39989.3 |
|       | 40200.5 36166.3 27443.0 52015.4 52309.0 61281.3 |        |   |                                                         |         |                                             |                                                                 |                 |                        |                 |   |         |
| cspC  | 4                                               | 9      | 2 | 4                                                       | 2       | 7169643018222982056945284743827294813183768 |                                                                 |                 |                        |                 |   |         |
|       | 4372.31 4114.33 4376.35 3086.68                 |        |   | 3683.66 97415.9 97131.8 110254. 327683. 333298. 335478. |         |                                             |                                                                 |                 |                        |                 |   |         |
| gaLE1 | 8                                               | 9      | 6 | 5                                                       | 3654.22 | 9                                           | 6                                                               | 2               | 9                      | 7               | 2 | 4       |

|  |       |         |         |         |         |         |         |         |         |           |          |         |   |  |  |  |  |  |  |  |
|--|-------|---------|---------|---------|---------|---------|---------|---------|---------|-----------|----------|---------|---|--|--|--|--|--|--|--|
|  | gaLE2 | 12973.3 | 13678.5 | 8181.83 | 3962.85 | 8698.77 | 301711. | 298306. | 324952. |           |          |         |   |  |  |  |  |  |  |  |
|  |       | 13581.7 | 4       | 9       | 4       | 7       | 8       | 7       | 4       | 81095517  | 10626971 | 145028  |   |  |  |  |  |  |  |  |
|  |       | 25288.1 | 25348.0 | 24169.0 | 12638.3 | 12480.8 | 11070.1 | 487946. | 464839. | 531454.   |          |         |   |  |  |  |  |  |  |  |
|  | gaLK  | 6       | 2       | 4       | 1       | 1       | 4       | 2       | 8       | 421266852 | 1945262  | 260797  |   |  |  |  |  |  |  |  |
|  | gaLM  |         |         |         |         |         |         | 9993.96 | 9949.47 | 15476.9   | 42983.9  | 47165.3 |   |  |  |  |  |  |  |  |
|  | 1     | 0       | 0       | 0       | 0       | 0       | 0       | 7       | 2       | 746253.9  | 6        | 1       |   |  |  |  |  |  |  |  |
|  | gaLM  | 7341.62 |         | 7873.89 | 3466.31 | 3954.18 | 4624.28 | 237730. | 235703. | 264347.   | 736947.  |         |   |  |  |  |  |  |  |  |
|  | 3     | 5       | 6477.87 | 1       | 3       | 1       | 1       | 3       | 3       | 5         | 735577   | 699845  | 8 |  |  |  |  |  |  |  |
|  |       | 25027.1 | 25950.5 | 25558.9 | 23531.4 | 24250.9 | 24761.4 | 507787. | 565960. |           |          |         |   |  |  |  |  |  |  |  |
|  | gaLU  | 9       | 9       | 6       | 5       | 8       | 1       | 9       | 490675  | 12073073  | 1907866  | 2013499 |   |  |  |  |  |  |  |  |
